# Supplementary material for: Use of cerebrospinal fluid and serum samples impregnated on FTATM Elute filter paper for the diagnosis of infections caused by Neisseria meningitidis, Streptococcus pneumoniae and Haemophilus influenzae
Source: PLOS journal article supplement (doi:10.1371/journal.pone.0172794), 2017-02-24
Supplement: S1 (10.1371/journal.pone.0172794.s001) [file journal.pone.0172794.s001]

**S1 Table. Real-time PCR positivity for detection of Nm, Spn, and Hi using DNA extracted by filter paper card FTA™ (one or two 3 mm discs) after 1 day or 7 days of impregnation of the sample on the card**

| Agents | N°. of positives |           |           |        |           |           |
|--------|------------------|-----------|-----------|--------|-----------|-----------|
|        | 1 day            |           |           | 7 days |           |           |
|        | Roche            | FTA™      |           | Roche  | FTA™      |           |
|        |                  | 1 disc    | 2 discs   |        | 1 disc    | 2 discs   |
| Nm     | 120              | 99 (83%)  | 114 (95%) | 120    | 97 (81%)  | 114 (95%) |
| Spn    | 72               | 59 (82%)  | 66 (92%)  | 72     | 59 (82%)  | 66 (92%)  |
| Hi     | 7                | 6 (86%)   | 7 (100%)  | 7      | 6 (86%)   | 7 (100%)  |
| Total  | 199              | 164 (82%) | 187 (94%) | 199    | 162 (81%) | 187 (94%) |

Nm, *Neisseria meningitidis*; Spn, *Streptococcus pneumoniae*; Hi, *Haemophilus influenzae*. In parentheses is the positivity of real-time PCR assay using DNA extracted by FTA™ card compared to results obtained with DNA extracted from automated system Roche MagNA Pure LC 2.0.
